# Supplementary material for: Human Cytomegalovirus Oncoprotection across Diverse Populations, Tumor Histologies, and Age Groups: The Relevance for Prospective Vaccinal Therapy
Source: MDPI journal article supplement (doi:10.3390/ijms25073741), 2024-03-27
Supplement: s1 [file s1]

**Supplementary Table S1.** Cytomegalovirus (CMV) infection vis-à-vis the full complement of malignancies as reported by the Global Cancer Observatory (GLOBOCAN): univariate linear regression analysis with model characteristics.

| Tumor/localization                           | Model characteristics |                | Univariate linear regression analysis |                     |         |
|----------------------------------------------|-----------------------|----------------|---------------------------------------|---------------------|---------|
|                                              | $R^2$                 | Adjusted $R^2$ | Standardized coefficients $\beta$     | 95% CI              | p-value |
| 1. Melanoma (skin)                           | 0.518                 | 0.511          | -0.719                                | -55.518 - -34.870   | <0.001* |
| 2. Kidney                                    | 0.627                 | 0.622          | -0.792                                | -24.206 - -16.731   | <0.001* |
| 3. All cancers                               | 0.603                 | 0.597          | -0.776                                | -617.383- -418.339  | <0.001* |
| 4. All cancers (excluding skin non-melanoma) | 0.605                 | 0.599          | -0.778                                | -511.328 - -347.189 | <0.001* |
| 5. Breast                                    | 0.569                 | 0.563          | -0.754                                | -157.096- -103.411  | <0.001* |
| 6. Testis                                    | 0.550                 | 0.543          | -0.741                                | -21.745 - -14.074   | <0.001* |
| 7. Non-melanoma (skin)                       | 0.247                 | 0.236          | -0.497                                | -125.137 - -51.914  | <0.001* |
| 8. Colorectum                                | 0.443                 | 0.435          | -0.665                                | -69.526 - -40.353   | <0.001* |
| 9. Vulva                                     | 0.494                 | 0.487          | -0.703                                | -4.388 - -2.681     | <0.001* |
| 10. Prostate                                 | 0.444                 | 0.437          | -0.667                                | -180.463- -104.942  | <0.001* |
| 11. Corpus uteri                             | 0.372                 | 0.364          | -0.610                                | -37.289 - -19.765   | <0.001* |
| 12. Oropharynx                               | 0.403                 | 0.395          | -0.635                                | -5.817 - -3.217     | <0.001* |
| 13. Pancreas                                 | 0.406                 | 0.398          | -0.638                                | -15.373 - -8.536    | <0.001* |
| 14. Multiple myeloma                         | 0.387                 | 0.378          | -0.622                                | -8.010 - -4.334     | <0.001* |
| 15. Leukemia                                 | 0.406                 | 0.398          | -0.637                                | -14.086 - -7.819    | <0.001* |
| 16. Hodgkin lymphoma                         | 0.389                 | 0.380          | -0.676                                | -19.579 - -11.543   | <0.001* |
| 17. Non-Hodgkin lymphoma                     | 0.456                 | 0.449          | -0.624                                | -5.022 - -2.724     | <0.001* |
| 18. Mesothelioma                             | 0.397                 | 0.389          | -0.630                                | -2.330 - -1.278     | <0.001* |
| 19. Lip/Oral cavity                          | 0.134                 | 0.122          | -0.367                                | -8.984 - -2.243     | 0.001*  |
| 20. Lung                                     | 0.329                 | 0.319          | -0.573                                | -67.639 - -33.443   | <0.001* |
| 21. Brain/CNS                                | 0.306                 | 0.297          | -0.554                                | -10.636 - -5.051    | <0.001* |
| 22. Thyroid                                  | 0.235                 | 0.224          | -0.485                                | -21.293 - -8.557    | <0.001* |
| 23. Bladder                                  | 0.300                 | 0.290          | -0.547                                | -26.023 - -12.197   | <0.001* |
| 24. Ovary                                    | 0.166                 | 0.154          | -0.407                                | -10.752 - -3.297    | <0.001* |
| 25. Penis                                    | 0.106                 | 0.094          | -0.326                                | -2.016 - -.375      | 0.005*  |
| 26. Hypopharynx                              | 0.056                 | 0.042          | -0.236                                | -2.963 - -.039      | 0.044*  |
| 27. Salivary glands                          | 0.102                 | 0.090          | -0.320                                | -.874 - -.154       | 0.006*  |
| 28. Gallbladder                              | 0.070                 | 0.057          | 0.265                                 | .265 - 3.539        | 0.023*  |
| 29. Nasopharynx                              | 0.052                 | 0.038          | 0.227                                 | -.023 - 3.451       | 0.053   |
| 30. Vagina                                   | 0.011                 | -0.003         | -0.105                                | -.418 - .160        | 0.377   |
| 31. Larynx                                   | 0.014                 | 0.000          | -0.117                                | -3.241 - 1.089      | 0.325   |
| 32. Esophagus                                | 0.003                 | -0.011         | -0.052                                | -6.196 - 3.949      | 0.660   |
| 33. Cervix uteri                             | 0.055                 | 0.042          | 0.234                                 | .349 - 36.440       | 0.046*  |
| 34. Stomach                                  | 0.002                 | -0.012         | 0.046                                 | -6.684 - 9.889      | 0.701   |
| 35. Kaposi's sarcoma                         | 0.018                 | 0.004          | 0.135                                 | -.626 - 2.321       | 0.255   |
| 36. Liver                                    | 0.034                 | 0.021          | 0.185                                 | -1.805-15.790       | 0.117   |

**Supplementary Table S2.** Cytomegalovirus (CMV) infection, the Human Development Index (HDI) and their relation to GLOBOCAN-reported malignancies: Multivariate linear regression analysis with model characteristics. The information originates from a set of 73 states globally.

| Tumor/localization                                 | Multivariate linear regression analysis |                          |                                 |         | Model characteristics |                            |
|----------------------------------------------------|-----------------------------------------|--------------------------|---------------------------------|---------|-----------------------|----------------------------|
|                                                    | Factor                                  | Stand.<br>coeff. $\beta$ | 95% Confidence<br>Interval (CI) | p-value | R <sup>2</sup>        | Adjusted<br>R <sup>2</sup> |
| 1. Melanoma (skin)                                 | CMV                                     | -.529                    | -46.017 - -20.828               | <0.001* | .573                  | .561                       |
|                                                    | HDI                                     | .306                     | 6.219-29.515                    | <0.001* |                       |                            |
| 2. Kidney                                          | CMV                                     | -.493                    | -16.622 - -9.031                | <0.001* | .771                  | .765                       |
|                                                    | HDI                                     | .484                     | 8.128 - 15.149                  | <0.001* |                       |                            |
| 3. All cancers                                     | CMV                                     | -0.482                   | -427.382 - -220.202             | <0.001* | .745                  | .737                       |
|                                                    | HDI                                     | 0.478                    | 200.918-392.535                 | <0.001* |                       |                            |
| 4. All cancers<br>(excluding skin<br>non-melanoma) | CMV                                     | -0.462                   | -338.43 - -175.618              | <0.001* | .770                  | .763                       |
|                                                    | HDI                                     | 0.513                    | 188.415-338.997                 | <0.001* |                       |                            |
| 5. Breast                                          | CMV                                     | -0.470                   | -110.714 - -51.989              | <0.001* | .690                  | .681                       |
|                                                    | HDI                                     | 0.454                    | 45.398-99.712                   | <0.001* |                       |                            |
| 6. Testis                                          | CMV                                     | -0.474                   | -15.813 - -7.165                | <0.001* | .658                  | .648                       |
|                                                    | HDI                                     | 0.427                    | 5.574-13.573                    | <0.001* |                       |                            |
| 7. Non-melanoma<br>(skin)                          | CMV                                     | -.372                    | -113.545- -19.880               | 0.006*  | .269                  | .248                       |
|                                                    | HDI                                     | .199                     | -10.322 - 76.308                | .133    |                       |                            |
| 8. Colorectum                                      | CMV                                     | -0.280                   | -37.341- -9.324                 | 0.001   | .696                  | .687                       |
|                                                    | HDI                                     | 0.632                    | 35.699-61.61                    | <0.001* |                       |                            |
| 9. Vulva                                           | CMV                                     | -0.761                   | -4.93 - -2.74                   | <0.001* | 0.493                 | 0.479                      |
|                                                    | HDI                                     | -0.103                   | -1.492-0.534                    | 0.349   |                       |                            |
| 10. Prostate                                       | CMV                                     | -0.470                   | -146.239 - -53.823              | <0.001* | .494                  | .479                       |
|                                                    | HDI                                     | 0.308                    | 17.813-103.286                  | 0.006*  |                       |                            |
| 11. Corpus uteri                                   | CMV                                     | -0.306                   | -24.353 - -4.35                 | 0.006*  | .510                  | .496                       |
|                                                    | HDI                                     | 0.483                    | 11.686-30.187                   | <0.001* |                       |                            |
| 12. Oropharynx                                     | CMV                                     | -0.533                   | -5.473 - -2.137                 | <0.001* | 0.413                 | 0.396                      |
|                                                    | HDI                                     | 0.157                    | -0.505-2.581                    | 0.184   |                       |                            |
| 13. Pancreas                                       | CMV                                     | -0.250                   | -8.109 - -1.334                 | 0.007*  | .655                  | .645                       |
|                                                    | HDI                                     | 0.631                    | 7.897-14.163                    | <0.001* |                       |                            |
| 14. Multiple<br>Myeloma                            | CMV                                     | -.338                    | -5.484 - -1.222                 | 0.002*  | .503                  | .489                       |
|                                                    | HDI                                     | .449                     | 2.145-6.086                     | <0.001* |                       |                            |
| 15. Leukemia                                       | CMV                                     | -0.218                   | -6.729 - -0.815                 | 0.013*  | .686                  | .677                       |
|                                                    | HDI                                     | 0.675                    | 8.061-13.53                     | <0.001* |                       |                            |
| 16. Hodgkin<br>lymphoma                            | CMV                                     | -0.363                   | -3.597 - -0.887                 | 0.002*  | .484                  | .469                       |
|                                                    | HDI                                     | 0.410                    | 1.091-3.597                     | <0.001* |                       |                            |
| 17. Non-Hodgkin<br>lymphoma                        | CMV                                     | -0.336                   | -11.93 - -3.424                 | 0.001   | .627                  | .617                       |
|                                                    | HDI                                     | 0.539                    | 7.457-15.329                    | <0.001* |                       |                            |
| 18. Mesothelioma                                   | CMV                                     | -0.344                   | -1.593 - -0.388                 | 0.002*  | .531                  | .518                       |
|                                                    | HDI                                     | 0.465                    | 0.683 - 1.797                   | <0.001* |                       |                            |
| 19. Lip/Oral cavity                                | CMV                                     | -0.368                   | -10.009 - -1.273                | 0.012*  | .127                  | .102                       |
|                                                    | HDI                                     | -0.019                   | -4.311-3.769                    | 0.894   |                       |                            |
| 20. Lung                                           | CMV                                     | -0.259                   | -39.905--5.328                  | 0.011*  | .580                  | .567                       |
|                                                    | HDI                                     | 0.574                    | 30.388-62.367                   | <0.001* |                       |                            |

|                             |     |        |                   |         |      |      |
|-----------------------------|-----|--------|-------------------|---------|------|------|
| <b>21. Brain/CNS</b>        | CMV | -0.219 | -6.249--0.007     | 0.050*  | .487 | .472 |
|                             | HDI | 0.541  | 4.251-10.024      | <0.001* |      |      |
| <b>22. Thyroid</b>          | CMV | -0.138 | -11.466-2.901     | 0.238   | .421 | .404 |
|                             | HDI | 0.554  | 9.213-22.501      | <0.001* |      |      |
| <b>23. Bladder</b>          | CMV | -0.328 | -19.99--3.009     | 0.009*  | .372 | .354 |
|                             | HDI | 0.351  | 3.53-19.235       | 0.005*  |      |      |
| <b>24. Ovary</b>            | CMV | -0.172 | -7.572-1.605      | 0.199   | .249 | .228 |
|                             | HDI | 0.375  | 1.77-10.257       | 0.006*  |      |      |
| <b>25. Penis</b>            | CMV | -0.251 | -1.99-0.134       | 0.086   | .110 | .085 |
|                             | HDI | 0.112  | -0.601-1.364      | 0.441   |      |      |
| <b>26. Hypopharynx</b>      | CMV | -0.261 | -3.566-0.232      | 0.084   | .055 | .027 |
|                             | HDI | -0.048 | -2.042-1.471      | 0.747   |      |      |
| <b>27. Salivary glands</b>  | CMV | -0.440 | -1.165 - -0.248   | 0.003*  | .123 | .098 |
|                             | HDI | -0.216 | -0.744-0.103      | 0.136   |      |      |
| <b>28. Gallbladder</b>      | CMV | 0.337  | 0.305-4.464       | 0.025*  | .074 | .047 |
|                             | HDI | 0.147  | -0.958-2.888      | 0.320   |      |      |
| <b>29. Nasopharynx</b>      | CMV | 0.338  | 0.337-4.804       | 0.025*  | .072 | .045 |
|                             | HDI | 0.184  | -0.775-3.357      | 0.217   |      |      |
| <b>30. Vagina</b>           | CMV | -0.389 | -0.869 - -0.23    | 0.007*  | .153 | .128 |
|                             | HDI | -0.483 | -0.824 - -0.133   | 0.001*  |      |      |
| <b>31. Larynx</b>           | CMV | 0.016  | -2.623-2.929      | 0.913   | .040 | .012 |
|                             | HDI | 0.209  | -0.769-4.366      | 0.167   |      |      |
| <b>32. Esophagus</b>        | CMV | -0.181 | -10.415-2.603     | 0.235   | .028 | .000 |
|                             | HDI | -0.201 | -10.048-1.992     | 0.186   |      |      |
| <b>33. Cervix uteri</b>     | CMV | -.175  | -33.474 - 5.858   | 0.166   | .336 | .317 |
|                             | HDI | -.671  | -67.266 - -30.889 | <0.001* |      |      |
| <b>34. Stomach</b>          | CMV | 0.172  | -4.411-16.379     | 0.255   | .037 | .009 |
|                             | HDI | 0.244  | -1.787-17.442     | 0.109   |      |      |
| <b>35. Kaposi's sarcoma</b> | CMV | 0.031  | -1.695-2.088      | 0.836   | .041 | .013 |
|                             | HDI | -0.182 | -2.812-0.686      | 0.230   |      |      |
| <b>36. Liver</b>            | CMV | 0.202  | -3.674-18.728     | 0.184   | .029 | .001 |
|                             | HDI | 0.065  | -8.125-12.595     | 0.668   |      |      |
